# Supplementary material for: On the presence of Dipturus nidarosiensis (Storm, 1881) in the Central Mediterranean area
Source: PeerJ. 2019 May 27;7:e7009. doi: 10.7717/peerj.7009 (PMC6542346; doi:10.7717/peerj.7009)
Supplement: Table S1 [file peerj-07-7009-s001.xlsx]

## Sheet: sequences
Species	GenBank (BOLD) acc n°	Haplotype code as in Fig. 5	Country	Origin	Reference
Dipturus batis	GU805786		Iceland	Antarctica	Cariani et al. Unpublished
Dipturus batis	JQ774529		Portugal	Atlantic	Costa et al., 2012
Dipturus batis	KJ204831		North Sea	Atlantic	Knebelsberger et al., 2014
Dipturus cf flossada	KF604218		Ireland	Atlantic	Lynghammar et al., 2014
Dipturus cf flossada	KF604219		United Kingdom: Rockall	Atlantic	Lynghammar et al., 2014
Dipturus cf flossada	KF604220		Ireland	Atlantic	Lynghammar et al., 2014
Dipturus cf intermedia	KF604221		Norway	Atlantic	Lynghammar et al., 2014
Dipturus cf intermedia	KF604222		United Kingdom: Scotland	Atlantic	Lynghammar et al., 2014
Dipturus cf intermedia	KF604223		United Kingdom: Scotland	Atlantic	Lynghammar et al., 2014
Dipturus nidarosiensis	KC262633	Hap_1	Spain: Gulf of Biscay	Atlantic	Rodriguez-Cabello et al 2013
Dipturus nidarosiensis	KT307203	Hap_1	Italy: Ionian Sea	Mediterranean	Cariani et al. 2017
Dipturus nidarosiensis	KT307210	Hap_1	Italy: Ionian Sea	Mediterranean	Cariani et al. 2017
Dipturus nidarosiensis	KT307199	Hap_1	Algeria	Mediterranean	Cariani et al. 2017
Dipturus nidarosiensis	HQ945978	Hap_7	South Africa	Atlantic	Steinke unpublished
Dipturus nidarosiensis	KF604234	Hap_7	United Kingdom: Rockall	Atlantic	Lynghammar et al., 2014
Dipturus nidarosiensis	KF604235	Hap_7	Atlantic Ocean: Rockall	Atlantic	Lynghammar et al., 2014
Dipturus nidarosiensis	KF604236	Hap_7	Norway	Atlantic	Lynghammar et al., 2014
Dipturus nidarosiensis	KF604237	Hap_7	Atlantic Ocean: Rockall	Atlantic	Lynghammar et al., 2014
Dipturus nidarosiensis	KF604238	Hap_1	Atlantic Ocean: Rockall	Atlantic	Lynghammar et al., 2014
Dipturus nidarosiensis	KF604239	Hap_1	Atlantic Ocean: Rockall	Atlantic	Lynghammar et al., 2014
Dipturus nidarosiensis	KF604240	Hap_7	Norway	Atlantic	Lynghammar et al., 2014
Dipturus nidarosiensis	KF604241	Hap_1	Atlantic Ocean: Rockall	Atlantic	Lynghammar et al., 2014
Dipturus nidarosiensis	KF604242	Hap_1	United Kingdom: Rockall	Atlantic	Lynghammar et al., 2014
Dipturus nidarosiensis	KF604243	Hap_1	United Kingdom: Rockall	Atlantic	Lynghammar et al., 2014
Dipturus nidarosiensis	KT307200	Hap_2	Italy: Adriatic Sea	Mediterranean	Cariani et al. 2017
Dipturus nidarosiensis	KT307201	Hap_1	Italy: Ionian Sea	Mediterranean	Cariani et al. 2017
Dipturus nidarosiensis	KT307202	Hap_1	Italy: Ionian Sea	Mediterranean	Cariani et al. 2017
Dipturus nidarosiensis	KT307207	Hap_1	Italy: Adriatic Sea	Mediterranean	Cariani et al. 2017
Dipturus nidarosiensis	MG699904	Hap_1	Italy: Adriatic Sea	Mediterranean	present paper
Dipturus nidarosiensis	MG699905	Hap_1	Italy: Adriatic Sea	Mediterranean	present paper
Dipturus nidarosiensis	MG699906	Hap_1	Italy: Adriatic Sea	Mediterranean	present paper
Dipturus nidarosiensis	MG699907	Hap_1	Italy: Adriatic Sea	Mediterranean	present paper
Dipturus nidarosiensis	KT307206	Hap_1	Italy: Sardinia	Mediterranean	Cariani et al. 2017
Dipturus nidarosiensis	KT307205	Hap_1	Italy: Sardinia	Mediterranean	Cariani et al. 2017
Dipturus nidarosiensis	KT307204	Hap_1	Italy: Sardinia	Mediterranean	Cariani et al. 2017
Dipturus nidarosiensis	KT307208	Hap_1	Italy: Sardinia	Mediterranean	Cariani et al. 2017
Dipturus nidarosiensis	KT307209	Hap_5	Italy: Sardinia	Mediterranean	Cariani et al. 2017
Dipturus nidarosiensis	KX783036	Hap_1	Spain: Alboran Island	Mediterranean	Ramirez-Amaro et al 2017
Dipturus nidarosiensis	KX783035	Hap_3	Spain: Alboran Island	Mediterranean	Ramirez-Amaro et al 2017
Dipturus nidarosiensis	KX783034	Hap_1	Spain: Alboran Island	Mediterranean	Ramirez-Amaro et al 2017
Dipturus nidarosiensis	KX783033	Hap_6	Spain: Alboran Island	Mediterranean	Ramirez-Amaro et al 2017
Dipturus nidarosiensis	KX783032	Hap_1	Spain: Alboran Island	Mediterranean	Ramirez-Amaro et al 2017
Dipturus nidarosiensis	KX783031	Hap_4	Spain: Alboran Island	Mediterranean	Ramirez-Amaro et al 2017
Dipturus nidarosiensis	KX783030	Hap_1	Spain: Alboran Island	Mediterranean	Ramirez-Amaro et al 2017
Dipturus nidarosiensis	KX783029	Hap_1	Spain: Alboran Island	Mediterranean	Ramirez-Amaro et al 2017
Dipturus nidarosiensis	KU761959	Hap_3	Spain: Alboran Sea	Mediterranean	Ramirez-Amaro et al 2017
Dipturus nidarosiensis	KU761958	Hap_1	Spain: Alboran Sea	Mediterranean	Ramirez-Amaro et al 2017
Dipturus oxyrinchus	BOLD:ABZ4263		Israel	Mediterranean	Stern et al unpublished
Dipturus oxyrinchus	GU805167		Italy: Sicily	Mediterranean	Cariani et al. 2017
Dipturus oxyrinchus	GU805168		Italy: Sicily	Mediterranean	Cariani et al. 2017
Dipturus oxyrinchus	GU805169		Italy: Sicily	Mediterranean	Cariani et al. 2017
Dipturus oxyrinchus	GU805170		Italy: Sicily	Mediterranean	Cariani et al. 2017
Dipturus oxyrinchus	GU805171		Italy: Sicily	Mediterranean	Cariani et al. 2017
Dipturus oxyrinchus	GU805191		Italy: Tuscany	Mediterranean	Cariani et al. 2017
Dipturus oxyrinchus	GU805192		Italy: Tuscany	Mediterranean	Cariani et al. 2017
Dipturus oxyrinchus	GU805193		Italy: Tuscany	Mediterranean	Cariani et al. 2017
Dipturus oxyrinchus	GU805194		Italy: Tuscany	Mediterranean	Cariani et al. 2017
Dipturus oxyrinchus	GU805431		Algeria	Mediterranean	Cariani et al. 2017
Dipturus oxyrinchus	GU805432		Algeria	Mediterranean	Cariani et al. 2017
Dipturus oxyrinchus	GU805433		Algeria	Mediterranean	Cariani et al. 2017
Dipturus oxyrinchus	GU805799		Italy: Puglia	Mediterranean	Cariani et al. 2017
Dipturus oxyrinchus	GU805801		Italy: Puglia	Mediterranean	Cariani et al. 2017
Dipturus oxyrinchus	GU805802		Italy: Puglia	Mediterranean	Cariani et al. 2017
Dipturus oxyrinchus	GU805803		Italy: Puglia	Mediterranean	Cariani et al. 2017
Dipturus oxyrinchus	GU805804		Italy: Puglia	Mediterranean	Cariani et al. 2017
Dipturus oxyrinchus	GU805805		Italy: Puglia	Mediterranean	Cariani et al. 2017
Dipturus oxyrinchus	GU805806		Italy: Puglia	Mediterranean	Cariani et al. 2017
Dipturus oxyrinchus	GU805808		Italy: Puglia	Mediterranean	Cariani et al. 2017
Dipturus oxyrinchus	GU805810		Italy: Puglia	Mediterranean	Cariani et al. 2017
Dipturus oxyrinchus	HM043215		Portugal	Atlantic	Serra_Pereira et al., 2011
Dipturus oxyrinchus	HM043216		Portugal	Atlantic	Serra_Pereira et al., 2011
Dipturus oxyrinchus	HM043217		Portugal	Atlantic	Serra_Pereira et al., 2011
Dipturus oxyrinchus	HM043218		Portugal	Atlantic	Serra_Pereira et al., 2011
Dipturus oxyrinchus	JQ774530		Portugal	Atlantic	Costa et al., 2012
Dipturus oxyrinchus	KF604244		Norway	Atlantic	Lynghammar et al., 2014
Dipturus oxyrinchus	KF604245		Norway	Atlantic	Lynghammar et al., 2014
Dipturus oxyrinchus	KF604246		Norway	Atlantic	Lynghammar et al., 2014
Dipturus oxyrinchus	KF604247		Norway	Atlantic	Lynghammar et al., 2014
Dipturus oxyrinchus	KF604248		Norway	Atlantic	Lynghammar et al., 2014
Dipturus oxyrinchus	KF604249		Norway	Atlantic	Lynghammar et al., 2014
Dipturus oxyrinchus	KF604250		Norway	Atlantic	Lynghammar et al., 2014
Dipturus oxyrinchus	KF604251		Norway	Atlantic	Lynghammar et al., 2014
Dipturus oxyrinchus	KF604252		Norway	Atlantic	Lynghammar et al., 2014
Dipturus oxyrinchus	KF604253		Norway	Atlantic	Lynghammar et al., 2014
Dipturus oxyrinchus	KJ709752		Malta	Mediterranean	Landi et al 2014
Dipturus oxyrinchus	KJ709753		Malta	Mediterranean	Landi et al 2014
Dipturus oxyrinchus	KJ709754		Malta	Mediterranean	Landi et al 2014
Dipturus oxyrinchus	KU761957		Spain: Balearic Is	Mediterranean	Ramirez-Amaro et al 2017
Dipturus oxyrinchus	KU761956		Spain: Balearic Is	Mediterranean	Ramirez-Amaro et al 2017
Rostroraja alba	GU805140		Italy: Sicily	Mediterranean	Cariani et al. 2017
Rostroraja alba	GU805668		Antarctica	Antarctica	Cariani et al. Unpublished
Rostroraja alba	GU805669		Antarctica	Antarctica	Cariani et al. Unpublished
Rostroraja alba	GU805670		Antarctica	Antarctica	Cariani et al. Unpublished
Rostroraja alba	GU805674		Antarctica	Antarctica	Cariani et al. Unpublished
Rostroraja alba	GU805691		Antarctica	Antarctica	Cariani et al. Unpublished
Rostroraja alba	GU805696		Antarctica	Antarctica	Cariani et al. Unpublished
Rostroraja alba	GU805697		Antarctica	Antarctica	Cariani et al. Unpublished
Rostroraja alba	GU805707		Antarctica	Antarctica	Cariani et al. Unpublished
Rostroraja alba	JF494387		South Africa: Agulhas Bank	Atlantic	Steinke unpublished
Rostroraja alba	JF494388		South Africa: Agulhas Bank	Atlantic	Steinke unpublished
Rostroraja alba	JF494389		South Africa: Agulhas Bank	Atlantic	Steinke unpublished
Rostroraja alba	JF494390		South Africa: Agulhas Bank	Atlantic	Steinke unpublished
Rostroraja alba	JF494391		South Africa: Agulhas Bank	Atlantic	Steinke unpublished
Rostroraja alba	KT307417		Italy: Tuscany	Mediterranean	Cariani et al. 2017
Rostroraja alba	KT307418		Algeria	Mediterranean	Cariani et al. 2017
Rostroraja alba	KT307419		Italy: Tuscany	Mediterranean	Cariani et al. 2017
Rostroraja alba	KT307420		Italy: Tuscany	Mediterranean	Cariani et al. 2017
Rostroraja alba	KT307421		Algeria	Mediterranean	Cariani et al. 2017

## Sheet: references
References
Cariani et al. Unpublished
Cariani, A., S. Messinetti, A. Ferrari, M. Arculeo, J. J. Bonello, L. Bonnici, R. Cannas, P. Carbonara, A. Cau, C. Charilaou, N. El Ouamari, F. Fiorentino, M. C. Follesa, G. Garofalo, D. Golani, I. Guarniero, R. Hanner, F. Hemida, O. Kada, S. Lo Brutto, C. Mancusi, G. Morey, P. J. Schembri, F. Serena, L. Sion, M. Stagioni, A. Tursi, N. Vrgoc, D. Steinke & F. Tinti, 2017. Improving the Conservatio…
Costa,F.O., Landi,M., Martins,R., Costa,M.H., Costa,M.E., Carneiro,M., Alves,M.J., Steinke,D. and Carvalho,G.R. A ranking system for reference libraries of DNA barcodes: application to marine fish species from Portugal PLoS ONE 7 (4), E35858 (2012)
Knebelsberger,T., Landi,M., Neumann,H., Kloppmann,M., Sell,A.F., Campbell,P.D., Laakmann,S., Raupach,M.J., Carvalho,G.R. and Costa,F.O. A reliable DNA barcode reference library for the identification of the North European shelf fish fauna Mol Ecol Resour 14 (5), 1060-1071 (2014)
Landi,M., Dimech,M., Arculeo,M., Biondo,G., Martins,R., Carneiro,M., Carvalho,G.R., Brutto,S.L. and Costa,F.O. DNA barcoding for species assignment: the case of Mediterranean marine fishes PLoS ONE 9 (9), E106135 (2014)
Lynghammar,A., Christiansen,J.S., Griffiths,A.M., Fevolden,S.-E., Hop,H. and Bakken,T. DNA barcoding of the northern Northeast Atlantic skates (Chondrichthyes, Rajiformes), with remarks on the widely distributed starry ray Zool. Scr. 43 (5), 485-495 (2014)
Ramirez-Amaro,S., Ordines,F., Puerto,M.A., Garcia,C., Ramon,C., Terrasa,B. and Massuti,E. New morphological and molecular evidence confirm the presence of the Norwegian skate Dipturus nidarosiensis (Storm, 1881) in the Mediterranean Sea and extend its distribution to the western basin Mediterr Mar Sci 18 (2), 251-259 (2017)
Rodriguez-Cabello,C., Perez,M. and Sanchez,F. New records of chondrichthyan species caught in the Cantabrian Sea (southern Bay of Biscay) J. Mar. Biolog. Assoc. U.K. 93 (7), 1929-1939 (2013)
Serra-Pereira,B., Moura,T., Griffiths,A.M., Serrano Gordo,L. and Figueiredo,I. Molecular barcoding of skates (Chondrichthyes: Rajidae) from the southern Northeast Atlantic Zool. Scr. 40 (1), 76-84 (2011)
Steinke,D. unpublished
Stern et al unpublished
